## **Bovine neutrophils release extracellular traps and cooperate with macrophages in *Mycobacterium avium* subsp. *paratuberculosis* clearance**

1 **Ladero-Auñon I<sup>1,2</sup>, Molina E<sup>1</sup>, Holder A<sup>3</sup>, Kolakowski J<sup>3</sup>, Harris H<sup>2</sup>, Urkitza A<sup>4</sup>,**  
2 **Anguita J<sup>5,6</sup>, Werling D<sup>3</sup>, Elguezabal N<sup>1</sup>.**

3 <sup>1</sup>Animal Health Department, Basque Institute for Agricultural Research and  
4 Development, NEIKER- Basque Research and Technology Alliance (BRTA), (Derio)  
5 Bizkaia, Spain

6 <sup>2</sup>Food Quality and Safety Department, University of the Basque Country (UPV/EHU)

7 <sup>3</sup>Molecular Immunology Laboratory, Department of Pathobiology and Population  
8 Sciences, Royal Veterinary College, Hatfield, Hertfordshire, UK

9 <sup>4</sup>Bovine Practitioner, Gernika, Bizkaia, Spain

10 <sup>5</sup>Inflammation and Macrophage Plasticity Laboratory, CIC bioGUNE-Basque Research  
11 and Technology Alliance (BRTA), (Derio) Bizkaia, Spain

12 <sup>6</sup>Ikerbasque, Basque Foundation for Science, Bilbao, Spain

13 **\* Correspondence:**

14 Corresponding Author

15 nelguezabal@neiker.eus

16 **Keywords: Neutrophils<sup>1</sup>, Macrophages<sup>2</sup>, IL-1 $\beta$ <sup>3</sup>, IL-8<sup>4</sup>, Extracellular Traps<sup>5</sup>,**  
17 ***Mycobacterium avium* subsp. *paratuberculosis*<sup>6</sup>, *Mycobacterium bovis*<sup>7</sup>.**

18 **Abstract**

19 *Mycobacterium avium* subsp. *paratuberculosis* (Map) is the underlying pathogen  
20 causing bovine paratuberculosis (PTB), an enteric granulomatous disease that mainly  
21 affects ruminants and for which an effective treatment is needed. Macrophages are the  
22 primary target cells for Map, which survives and replicates intracellularly by inhibiting  
23 phagosome maturation. Neutrophils are present at disease sites during the early stages  
24 of the infection, but seem to be absent in the late stage, in contrast to healthy tissue.  
25 Although neutrophil activity has been reported to be impaired following Map infection,  
26 their role in PTB pathogenesis has not been fully defined. Neutrophils are capable of  
27 releasing extracellular traps consisting of extruded DNA and proteins that immobilize  
28 and kill microorganisms, but this mechanism has not been evaluated against Map. Our  
29 main objective was to study the interaction of neutrophils with macrophages during an  
30 *in vitro* mycobacterial infection. For this purpose, neutrophils and macrophages from  
31 the same animal were cultured alone or together in the presence of Map or  
32 *Mycobacterium bovis* Bacillus-Calmette-Guérin (BCG). Extracellular trap release,  
33 mycobacteria killing as well as IL-1 $\beta$  and IL-8 release were assessed. Extracellular trap

34 formation was highest in neutrophils against Map in the presence of macrophages, but  
35 without direct cell contact, indicating a paracrine activation. Macrophages were  
36 extremely efficient at killing BCG, but ineffective at killing Map. In contrast,  
37 neutrophils showed similar killing rates for both mycobacteria. Co-cultures infected  
38 with Map showed the expected killing effect of combining both cell types, whereas co-  
39 cultures infected with BCG showed a potentiated killing effect beyond the expected  
40 one, indicating a potential synergistic cooperation. In both cases, IL-1 $\beta$  and IL-8 levels  
41 were lower in co-cultures, suggestive of a reduced inflammatory reaction. These data  
42 indicate that cooperation of both cell types can be beneficial in terms of decreasing the  
43 inflammatory reaction while the effective elimination of Map can be compromised.  
44 These results suggest that neutrophils are effective at Map killing and can exert  
45 protective mechanisms against Map that seem to fail during PTB disease after the  
46 arrival of macrophages at the infection site.

## 47 **Introduction**

48 *Mycobacterium avium* subsp. *paratuberculosis* (Map) is the aetiological agent of  
49 paratuberculosis (PTB; Johne's disease), a chronic granulomatous enteritis of ruminants  
50 characterized by cachexia and severe diarrhoea resulting in production losses due to  
51 silent sub-clinically infection and animal losses due to clinically active disease (1).  
52 Infected animals in the subclinical stage shed Map intermittently to the environment,  
53 making its control difficult. Vaccination against PTB has been shown to be a cost  
54 effective method (2) that reduces shedding and therefore in-herd transmission (3).  
55 However, vaccination does not provide complete protection from infection (4).  
56 Furthermore, due to the nature of Map antigens, available inactivated vaccines interfere  
57 with the official tests for bovine tuberculosis (bTB) eradication program. In this sense,  
58 further research on PTB pathogenesis and vaccine development is needed.

59

60 Classically, PTB research has been focused on the action of macrophages (M $\Phi$ ) since  
61 these are considered to be the main target cell in the host. After infection, Map is able to  
62 survive and replicate intracellularly by inhibiting phagosome maturation. Less attention  
63 has been paid to the role that polymorphonuclear neutrophils (PMN) may play in this  
64 process, although their presence has been shown at disease sites during the early stages  
65 of the infection (5). PMNs are short-lived effector cells capable of phagocytosing

66 pathogens, capturing and killing microbes through the production of reactive oxygen  
67 species (ROS), lytic enzymes with potent antimicrobial activity (6) as well as the  
68 release of extracellular traps (ETs) in the extracellular space (7, 8).

69

70 ET formation has been demonstrated as an important novel effector mechanism against  
71 pathogens in PMNs (8) and M $\Phi$ s (9), among other immune cells. ETs are extracellular  
72 structures composed of chromatin and granule proteins that trap and kill  
73 microorganisms (10). ET formation in PMNs is triggered by many pathogen and danger  
74 associated molecular patterns (microorganisms, histones, immune complexes,  
75 HMGB1), exogenous compounds (PMA, zymosan, calcium and potassium ionophores),  
76 platelets, antibodies and inflammatory cytokines, such as IL-8 and TNF (11, 12). M $\Phi$   
77 have been reported to produce ETs in response to different pathogens such as  
78 *Staphylococcus aureus* (13), *Mycobacterium tuberculosis* (Mtb) (14) and the parasite  
79 *Besnoitia besnoiti* (15). However, this antimicrobial mechanism does not seem to be  
80 dominant in M $\Phi$ , and it seems that this cell type would be more prone to clearing ETs  
81 produced by PMNs and resulting apoptotic PMN than to producing ETs (16).

82

83 Indeed, several studies have described the cooperation of PMN and M $\Phi$  to remove  
84 pathogens at the inflammation site (17, 18). PMN are proposed as key mediators,  
85 increasing the M $\Phi$ ' killing capacity through phagocytosis of apoptotic PMN, in a  
86 process called efferocytosis, which can potentially result in cross-presentation. This  
87 mechanism provides M $\Phi$  with antimicrobial molecules that are lacking in the mature  
88 M $\Phi$  and that aid in the killing of intracellular pathogens (18, 19). PMN also transfer  
89 ingested intracellular pathogens to M $\Phi$  during efferocytosis (18).

90

91 In addition to PMN and M $\Phi$ , the pro-inflammatory cytokines IL-1 $\beta$  and IL-8 are also  
92 essential components in the formation of granulomas in mycobacterial infections. IL-1 $\beta$   
93 is a key mediator of the inflammatory response produced by cells of the innate immune  
94 system that further attracts M $\Phi$  (20) and leads to a general activation of the immune  
95 system. Furthermore, IL-1 $\beta$  seems to play an important role in protecting mice against  
96 experimental Map infection (21). Although essential for resistance to infection, IL-1 $\beta$   
97 also exacerbates damage during chronic diseases and acute tissue injuries, and has been  
98 suggested that it may be used by Map to attract M $\Phi$  to the site of infection, thus

99 ensuring its survival and dissemination (22). IL-8 release by human PMN is important  
100 in leukocyte recruitment, granuloma formation, and respiratory burst in response to  
101 Mtb. IL-8 can bind Mtb improving the phagocyte's ability to ingest and kill the  
102 bacterium (23) and it is considered as a major ET inducer for PMN (24).

103

104 There is little research on the protective role of PMN in Map infection in cattle. PMN  
105 isolated from cattle infected sub-clinically with Map showed diminished migratory  
106 properties when stimulated *in vitro* compared to PMN of healthy cattle (25), suggesting  
107 that Map infection potentially undermines PMN functionality. Indeed, PMN seem to be  
108 absent compared to healthy tissue in cows with clinical PTB(26). In the last years,  
109 several transcriptome studies have supported the idea that Map infection causes an  
110 impairment of PMN recruitment (27, 28) and the downregulation of antimicrobial  
111 peptide production by PMN, such as those of beta-defensins (29) and cathelicidins (28).  
112 A recent study has shown that cathelicidin LL-37 produced by human PMN restricts  
113 Mtb growth (30) and facilitates Map clearance in murine M $\Phi$  by suppressing the  
114 production of tissue-damaging inflammatory cytokines such as IL-8, TNF and IFN- $\gamma$   
115 (31). Taken together, these studies suggest that PMN may play a more important role  
116 than previously thought during the early stages of Map infection and further studying  
117 this immune cell type may provide further evidence for potential novel intervention  
118 strategies.

119

120 In order to gain knowledge on PMN and Map interaction, we studied the individual and  
121 cooperative interaction of bovine monocyte-derived M $\Phi$  (MDM) and PMNs, either  
122 alone or in co-cultures with Map and BCG, evaluating ET formation, bacterial killing  
123 and pro-inflammatory cytokine (IL-1 $\beta$  and IL-8 ) levels. This is the first study to  
124 investigate ET release in response to Map exposure.

125

## 126 **Materials and Methods**

### 127 **Animals**

128 Blood samples were drawn from a healthy Holstein Friesian herd in a commercial dairy  
129 farm located in the Basque Country. The herd is enrolled in the national bTB  
130 eradication program. Animals on the farm tested negative for bTb by skin-test over the  
131 last five years. All animals used in this study (n=4) tested negative for Map shedding in

132 faeces, as confirmed by PCR, and were negative for Map-specific antibodies to Map, as  
133 determined by PPA-3 ELISA.

134

135 Animals used in this study were submitted only to procedures that according to  
136 European (Directive 2010/63/EU of the European Parliament and of the Council of 22  
137 September 2010 on the protection of animals used for scientific purposes. Chapter 1,  
138 Article 1, Section 5, paragraphs b and f) and Spanish (Real Decreto 53/2013, de 1 de  
139 febrero, por el que se establecen las normas básicas aplicables para la protección de los  
140 animales utilizados en experimentación y otros fines científicos, incluyendo la docencia,  
141 Article 2, Section 5, Paragraphs b and f) legislation on experimental animals are exempt  
142 from its application. The animals, belonging to a registered commercial farm supervised  
143 by the local livestock authority (Servicio de Ganadería de la Diputación Foral de  
144 Bizkaia) were submitted only to the introduction of a needle in accordance with good  
145 veterinary practice and were not killed in relationship with this study.

146

#### 147 **Bovine peripheral blood monocyte isolation and generation of macrophages**

148 Blood was taken from the jugular vein using a 16G x 11/2 hypodermic needle into a  
149 blood-collection bag containing 63 mL of citrate phosphate dextrose adenine (CPDA;  
150 TerumoBCT Teruflex) for a total capacity of 450 mL, which was used for monocyte  
151 isolation. One month later, 40 mL of blood from the same cows were collected with a  
152 18G hypodermic needle into a 50 mL tube containing 7 mL of CPDA for PMN  
153 isolation. Blood samples were processed within two hours of the extraction.

154 Peripheral blood mononuclear cells (PBMCs) were separated using Histopaque 1077®  
155 and monocytes were selected using mouse anti-human CD14-coupled microbeads and  
156 MS columns (Miltenyi) following the manufacturer's recommendations. Greater than  
157 90% of purity of monocytes was achieved as determined by flow cytometry using a  
158 mouse anti-bovine CD14 FITC-labelled antibody (BioRad).

159

160 For the production of MDM, monocytes were plated at  $1 \times 10^5$  cells/well for co-cultures  
161 and at  $2 \times 10^5$  cells/well for MDM cultures in wells of 96-well plates for fluorimetric  
162 assays to quantify ET release. For immunofluorescence microscopy, monocytes were  
163 plated at  $1 \times 10^5$  cells/well for co-cultures and at  $2 \times 10^5$  cells/well for MDM cultures on  
164 16-well chamber slides (178599PK Thermo Scientific). For contact independent  
165 cultures, monocytes were plated at  $5 \times 10^5$  cells/well for co-cultures and at  $1 \times 10^6$

166 cells/well in wells of 24-well plates. During maturation to M $\Phi$ , monocytes were  
167 cultured in RPMI 1640 media without phenol red (Gibco 11835030), supplemented  
168 with 2mM L-glutamine, 10% foetal bovine serum (FBS), 1% penicillin-streptomycin  
169 and 40 ng/mL recombinant bovine M-CSF (Kingfisher Biotech, Inc. RP1353B) at 37°C  
170 and 5% CO<sub>2</sub>. The media was replaced every three days and prior to the beginning of the  
171 mycobacterial infection assays. After 7 days of culture, M $\Phi$  morphology was confirmed  
172 by light microscopy (increased size, increased adherence, cytoplasmic granularity and  
173 presence of pseudopods).

174

### 175 **Bovine neutrophil isolation**

176 A week after PBMC isolation, 25 mL of blood were drawn from the same cows by  
177 venepuncture and mixed with 25 mL of PBS supplemented with 2% FBS. 25 mL of the  
178 mixture were layered on top of 15 mL of Histopaque® 1077 (Sigma) and centrifuged at  
179 1200 x g for 45 min at RT with no brakes. PMNs were located at the lower end of the  
180 tube and were subjected to two flash hypotonic lysis using 25 mL of sterile distilled  
181 water during 20-30 sec, followed by 2.5 mL of a 10% NaCl solution and topped up with  
182 PBS-2% FBS, in order to eliminate remaining red blood cells. PMNs were then  
183 resuspended in RPMI 1640 with glutamine and without phenol red and counted. Over  
184 90% purity was achieved as determined by FSC and SSC gating and visualization of  
185 characteristic nuclei after DAPI staining under a fluorescence microscope.

186

### 187 **Bacterial strains and culture**

188 Map strains K10, Map K10-GFP (kindly provided by Dr. Jeroen de Buck, University of  
189 Calgary, (32)), *M.bovis* BCG Danish strain 1331 and *M. bovis* BCG Danish strain 1331-  
190 GFP (32) were used in the assays. All strains were grown to exponential phase at 37°C  
191 under aerobic conditions. Map-GFP and BCG-GFP were cultured for three weeks on  
192 Middlebrook 7H9 OADC with Kanamycin (25µg/mL) to select for GFP-plasmid  
193 carriers and supplementation with Mycobactin J was added for Map. Map strain K10  
194 and BCG Danish strain 1331 were used for ET isolation and quantification and were  
195 cultured in the same medium without kanamycin. Cultures were adjusted after reaching  
196 an OD of 0.7 (3x10<sup>8</sup> bacteria/mL) and colony forming units (CFU) were confirmed on  
197 agar after using 10-fold serial dilutions of bacterial suspensions. In experiments  
198 comparing the response to live and killed bacteria, heat-inactivation was performed by

199 heating bacteria for 30 min at 85°C. Inactivation of bacteria was confirmed by plating  
200 on agar plates.

201

## 202 Cell cultures and in vitro infection

203 A schematic representation of the different cell culture types is shown on Figure 1.  
204 PMNs and MDMs isolated from the same cow were cultured separately or co-cultured  
205 together in the same well (CC). In order to study cellular changes following paracrine  
206 signalling in the absence of cell-to-cell contact between PMNs and MDMs and also to  
207 determine ET formation, a transwell co-culture system was also employed. PMNs were  
208 seeded in the transwell insert (pore diameter 0.4 µm; Thermo Fisher Scientific 140620)  
209 to generate insert PMNs (TW-PMNs), whereas MDMs were seeded into the lower well  
210 (TW-MDM). ET release quantification and mycobacteria killing were performed on 24  
211 and 96 well plates. ET visualization was performed on 16-well chamber slides (Nunc  
212 Labtek).

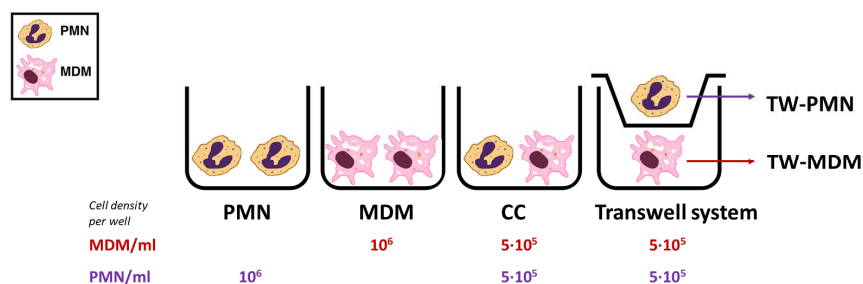

213

214 **Figure 1.** Cell culture types and conditions.

215

216 Once cell cultures were set, these were stimulated with live or heat-inactivated Map  
217 K10-GFP, *M. bovis* BCG -GFP, Map K10, *M. bovis* BCG at either a MOI of 1 (ET  
218 release) or a MOI of 5 (survival assay), zymosan (1mg/mL; Sigma Z4250), or left  
219 untreated (negative control). The original bacterial strains with no GFP were used for  
220 the isolation and quantification of NETs in the fluorometric assay to avoid GFP  
221 fluorescence interference. Cultures were incubated at 37°C and 5% CO<sub>2</sub> for 4h for ET  
222 release evaluation and for 24h for bacteria killing and cytokine levels.

223

## 224 Isolation and quantification of ETs

225 ET release was assayed as described by Köckritz-Blickwede et al (33) with some  
226 modifications. Briefly, ETs generated by cells were digested with 500 mU/mL of

227 micrococcal nuclease (10107921001 Roche) for 10 mins at 37°C 5% CO<sub>2</sub>. The nuclease  
228 activity was stopped by the addition of 5 mM EDTA; thereafter, culture supernatants  
229 were collected and stored at 4°C overnight. Total DNA was extracted from naive cells  
230 with DNeasy® blood & tissue kit (Qiagen) following the manufacturer's instructions.  
231 Extracted DNA was solubilized in TE buffer. Both ETs and genomic DNA was  
232 quantified using Quant-iT™ PicoGreen™ assay (ThermoFisher) according to the  
233 manufacturer's instructions. Plates were read in a fluorescence microplate reader  
234 (Synergy HTX, Biotek) with filter settings at 488 nm excitation and 520 nm emission.  
235 The percentage of DNA released as ET-DNA was calculated by dividing the amount of  
236 isolated ET-DNA by the total amount of genomic DNA.

237

### 238 **Visualization and quantification of ETs by immunofluorescence microscopy**

239 To assess histone staining as a marker for ET formation, cells were seeded into 16-well  
240 chamber slides for subsequent antibody staining and microscopy according to Conejeros  
241 et al (34). After 4 h of incubation with either Map-GFP, BCG-GFP or zymosan, cells  
242 were fixed for 15 min with 4 % formaldehyde. Cells were washed twice with PBS and  
243 kept in PBS at 4°C until staining was performed. Subsequently, cells were  
244 permeabilized for 15 min with PBS 0.1% Triton X-100, blocked with 1% goat serum  
245 containing 0.05% Tween 20 and 3% BSA-PBS. The immunofluorescence staining was  
246 performed overnight at 4°C using a mouse anti-pan-histone antibody (Merk MAB3422;  
247 diluted 1:200). Thereafter, cells were washed three-times with PBS and incubated with  
248 anti-mouse Alexa Fluor 594 labelled antibody (Invitrogen A-1105, diluted 1:500) for 30  
249 min at RT. Following further three washes with PBS, wells were detached from the  
250 slides and mounting medium containing DAPI was added before coverslips were added.  
251 Preparations were let dry and observed at 400x magnification on a DMi8 fluorescence  
252 inverted microscope (LEICA®). Pictures were taken using a DFC3000 G camera  
253 coupled to the microscope.

254 Quantification was performed by taking snapshots of five fields containing visible ETs  
255 with histone staining. Analysis was performed using the Image J software package.  
256 Snapshots in 8-bit format were analysed using the following pipeline. Threshold was  
257 adjusted depending on the micrograph, being 4 for low level and 255 for high level. The  
258 percentage of picture area occupied by ETs plus nuclei (total DNA) was measured by  
259 adjusting the settings for fluorescent particle size: 0-infinity and circularity: 0-1. The



260 percentage of picture area occupied by nuclei were analysed adjusting the settings for  
261 particle size: 200-5000 and circularity: 0.3-1. ET percentage was calculated as total  
262 DNA percentage minus nuclei percentage. In the case of cultures that did not contain  
263 ETs, nuclei were measured, and ET release was considered zero.

#### 264 **Mycobacteria killing assay**

265 PMNs, MDMs and co-cultures inoculated with BCG -GFP and Map-GFP were  
266 prepared. At time 0 (4°C control) and 24 h, the supernatants were removed and  
267 centrifuged to pellet non-internalized mycobacteria. Supernatants were stored for  
268 cytokine analysis. Wells were washed twice with PBS to remove the remaining non-  
269 internalized bacteria. Bacterial pellets and washes of remaining bacteria were  
270 centrifuged together, and the final pellets were resuspended in 100 µL of filtered PBS.  
271 Adherent cells were lysed by vigorous pipetting with 0.5 mL of 0.1% Triton X-100  
272 (Sigma-Aldrich) in sterile water for 10 min at RT.

273 Two serial 10-fold dilutions of each lysed sample and supernatant were performed in a  
274 total volume of 1 mL using filtered PBS. 200 µl of each dilution was inoculated in  
275 duplicate in Middlebrook 7H9 OADC-Kanamycin (25µg/mL) agar plates, supplemented  
276 with mycobactin J in the case of Map cultures. Seeded agar plates were allowed to dry  
277 at RT until humidity was no longer visible. Plates were sealed with tape to avoid  
278 desiccation and incubated at  $37 \pm 1$  °C for 6 weeks. CFU were counted and 0h (4°C  
279 control) CFU were considered total inoculated bacteria, 24h CFU supernatant bacteria  
280 were considered non-internalized non-killed and 24h CFU cell bacteria were considered  
281 internalized and non-killed bacteria. Killed bacteria were estimated as total inoculated  
282 bacteria minus (24h CFU supernatant bacteria plus 24h CFU cell bacteria). CFU counts  
283 were multiplied by the inverse dilution factor and by the seeded volume. The mean of  
284 duplicate plates was calculated and the group mean for each culture type was calculated.  
285 Supernatants' fraction and cell-lysis' fractions were divided by the 100 % survival  
286 control to calculate the survival percentage of each portion and the killing rate.

#### 287 **Cytokine detection assay**

288 Commercially available direct ELISA kits were performed to determine bovine IL-1β  
289 (ESS0027 Invitrogen®) and IL-8 (3114-1A-6 MABTECH) release in 24h culture  
290 supernatants using the provided manufacturer's instructions. IL-1β ELISA is based on  
291 streptavidin-HRP and IL-8 on streptavidin-ALP. Absorbances were measured using an

292 automated ELISA plate reader (Multiskan EX®, Thermo Lab Systems, Finland) and in  
293 all cases standard curves were used to determine each cytokine amount in the  
294 supernatant samples.

295

## 296 **Statistics**

297 Normality of data distribution and homoscedasticity were tested using Shapiro-Wilk  
298 and Bartlett's test respectively. All data are presented as the mean +/- standard deviation  
299 (SD) of four animals in triplicates for ET release by fluorimetry and in duplicates for  
300 bacterial killing and cytokine release. ET% differences between culture type's means  
301 were calculated using pairwise comparisons using t tests with pooled SD for all the  
302 stimuli except for unstimulated and zymosan stimulated cultures, where  
303 homoscedasticity could not be assumed, and comparisons were calculated using non-  
304 pooled SD test.

305

306 The total inoculated CFU at 0 h was considered 100% survival. The survival at 24 h was  
307 calculated as the sum of internalized mycobacteria CFU and supernatant mycobacteria  
308 CFU. The killing rate was calculated as the difference between the CFU at 0h and the  
309 survival at 24 h expressed as a percentage. Killing rate means were compared through  
310 multiple pairwise comparisons using t tests with non-pooled SD with BH correction. In  
311 co-cultures, expected killing rate for each mycobacterial strain was calculated by  
312 dividing each individual culture (PMN, MDM) killing rate by two and adding both  
313 obtained values.

314

315 Differences in IL-1 $\beta$  levels were compared employing the Kruskal-Wallis test with the  
316 post-hoc Dunn's multiple comparison test. IL-8 level differences were calculated  
317 through multiple pairwise comparisons using t tests with pooled SD.

318

319 Pearson ( $\rho_{x,y}$ ) and Spearman ( $\rho$ ) coefficients were calculated for correlation between  
320 variables to detect linear and non-linear correlations and in each case the best fitting  
321 coefficient value was chosen.

322

323 All the statistical tests were performed using R studio desktop (version 1.2.5033;  
324 (RStudio Team, 2019. RStudio: Integrated Development for R. RStudio, Inc., Boston,

325 MA URL <http://www.rstudio.com/>.) A p-value <0.05 was considered statistically  
326 significant.

## 327 Results

### 328 PMNs release extracellular traps against both mycobacteria killed and alive in 329 contrast to MDMs

330 PMNs and MDMs were cultured either separately or together to study ET release as a  
331 response to Map and BCG exposure. In order to assess whether this mechanism would  
332 rely on live bacteria or whether heat-killed bacteria would be capable of inducing  
333 similar effects, all culture cell types were incubated with both live and heat-inactivated  
334 Map and BCG.

335 Fluorometric analysis revealed that both cell types cultured individually extruded  
336 similar detectable DNA levels under unspecific stimulation with zymosan, whereas in  
337 co-cultures, cells released lower ET levels (Figure 2). ET release levels against  
338 mycobacteria were lower and similar for all culture cell types when challenged with live  
339 bacteria. In contrast, PMNs showed higher ET release against killed mycobacteria  
340 compared to MDMs (K-BCG,  $p=0.03$ ; K-Map,  $p=0.065$ ) and to CC (K-BCG,  $p=0.04$ ;  
341 K-Map,  $p=0.043$ ).

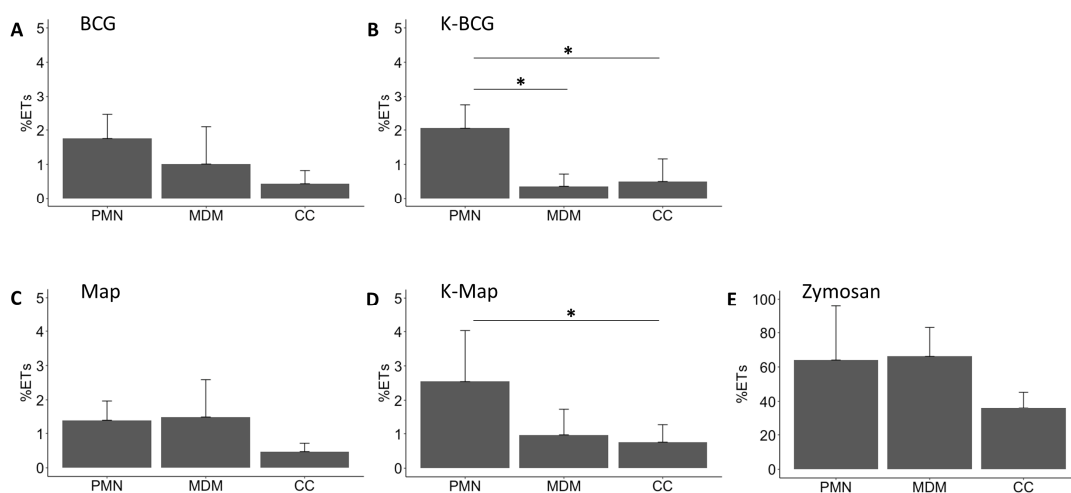

342

343 **Figure 2.** ET release quantified by fluorimetry by PMNs, MDMs and CCs stimulated  
344 with BCG, K-BCG, Map, K-Map and zymosan. Data are composed of combined values  
345 obtained of all cows (n=4), with samples run in triplicates. \* depicts a p value of  $p <$   
346 0.05.

347 **PMNs and MDMs alone or in direct co-cultures exert different effector**  
348 **mechanisms against BCG and Map**

349 Although fluorometric quantification analysis revealed significant differences in ET  
350 release among cell culture types, further analysis of images was performed to  
351 discriminate between DNA from ET release and DNA liberated by other means. Image  
352 analysis quantification of ETs showed that PMNs liberated significantly higher levels of  
353 ETs (6.52% - 7.23%) compared to CCs (1.13% - 2.03%) and MDMs (0%) when  
354 stimulated with both mycobacteria (Figure 3 graphs). Significant differences were not  
355 observed between cells incubated with killed or live mycobacteria. As seen before,  
356 MDMs produced ET-like structures only when stimulated with zymosan. MDMs and  
357 PMNs, cultured either separately or in direct contact and stimulated with zymosan lost  
358 normal nuclei structure, ending in nuclear DNA extrusion (Figure 3 E). However, co-  
359 cultures seemed to possess fewer ETs, which could be due to MDMs phagocytosing  
360 liberated ETs by PMNs or because direct contact of both cell types inhibits ET release.

361 In case of ETs being produced by PMN, anti-histone immunolabelling, shown in red,  
362 was not always associated with DAPI-stained nuclei but mainly within the extruded ETs  
363 (Figure 3A PMNs and 3C PMNs and CC). MDMs showed internalized mycobacteria  
364 but did not show ET release (Figure 3A and 3C MDMs). Furthermore, MDM nuclei  
365 were always stained with the anti-histone antibody and DAPI when cultured in the  
366 presence of BCG or Map live or dead (Figure 3A, 3B, 3C and 3D MDMs). In addition,  
367 MDMs showed less mycobacterial internalization when they were in co-culture,  
368 whereas the opposite was observed with PMNs (Figure 3A and 3C CCs). However, in  
369 Map stimulated CCs, PMNs nuclei were not always labelled by the anti-histone  
370 antibody, and many PMNs showed condensed nuclei, potentially indicative of apoptosis  
371 (Figure 3C CC). In CC, ETs were rarely detected and MDMs presented a red punctate  
372 pattern in the cytoplasm (Figure 3A and 3C CCs) that could be phagocytosed histones  
373 liberated by PMNs or by themselves.

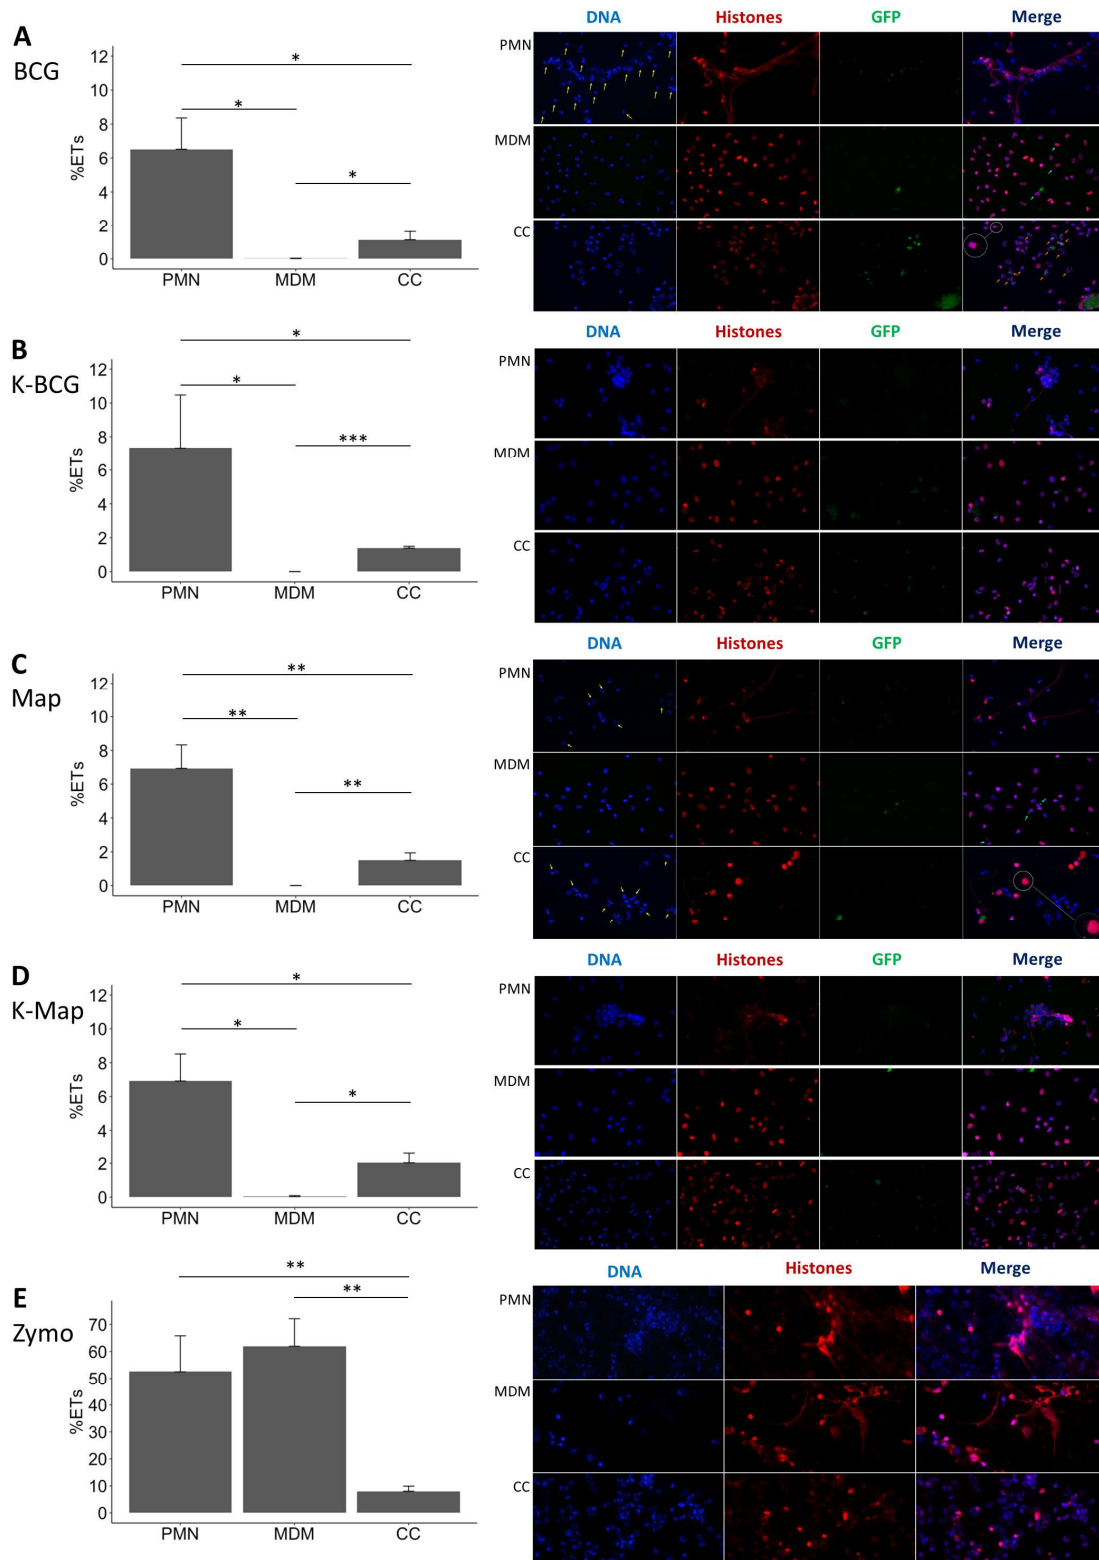

374  
 375 **Figure 3.** ET release quantified by immunofluorescence microscopy image analysis and  
 376 micrographs (40x) of A) BCG, B) K-BCG, C) Map, D) K-Map and E) zymosan  
 377 stimulated PMNs, MDMs and CCs. DAPI stained DNA in blue, histones in red and  
 378 BCG-GFP or Map-GFP in green. Yellow arrows indicate nuclei stained with DAPI, but  
 379 not immunolabeled for histones. Light-blue arrows indicate MDM phagocytosis.  
 380 Orange arrows indicate PMN phagocytosis of BCG. A white circle has an augmented

381 image showing a red punctate pattern in MDMs. Data composed of combined values  
382 obtained of all cows (n=4), with samples run in duplicates and 5 fields quantified per  
383 micrograph. (\* p<0.05; \*\* p<0.01;\*\*\* p<0.001)

384 **PMNs separated by transwell from MDMs release higher levels of ET in response**  
385 **to mycobacteria**

386 Having established that both mycobacterial species induce ET formation in PMNs and  
387 less in MDMs, we next assessed if co-culturing both cell types resulted in an additive  
388 effect. Both cell types were cultured either in direct contact or separated by the  
389 transwell membrane in order to study if ET release was influenced by paracrine  
390 signalling.

391

392 In general, ETosis by PMNs alone (Figure 2) was lower compared to that seen in TW-  
393 PMN (Figure 4) for all stimuli tested, potentially indicating that MDMs stimulate ET  
394 release by PMNs in a paracrine manner. Furthermore, direct cell contact induced the  
395 lowest ET release compared to the rest of the culture types and ET release was highest  
396 in TW-PMNs compared to all other culture types, independent whether cells were  
397 stimulated with either mycobacteria both, inactivated and alive (p<0.001). ETosis by  
398 TW-PMN being higher in response to Map compared to BCG (p=0.015).

399

400 The ET release in zymosan-stimulated cultures was relatively homogenous in the  
401 transwell system culture conditions (Figure 4E). Interestingly, TW-PMNs and TW-  
402 MDMs showed similar ET release levels ranging from 60-70% upon stimulation with  
403 zymosan but ET formation was reduced to 36.07±9.16 % when PMN and MDM were  
404 cultured with direct contact in co-cultures (CC), showing significant differences with  
405 TW-PMN (69.96±3.34 %) (p=0.028).

406

407 TW-MDMs showed similar ET release values for both alive and killed Map (Figure 4),  
408 whereas TW-PMNs showed a higher ET release when stimulated with live Map (Figure  
409 4C). Statistical analysis revealed that TW-PMNs had higher ETosis values compared to  
410 TW-MDMs when stimulated with live Map (p=0.022) and K-Map (p= 0.029),  
411 indicating that PMNs are more prone to ET release in the presence of mycobacteria and  
412 paracrine stimulation by MDMs.

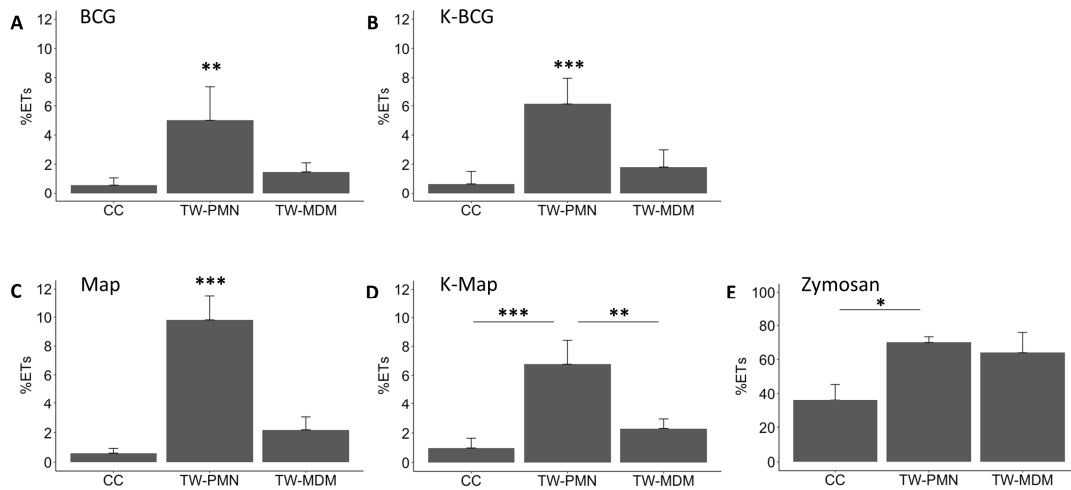

413

414 **Figure 4.** ET release by different culture types CC (in contact co-cultures), TW-PMN  
415 (PMNs in transwell co-culture), TW-MDM (MDMs in transwell co-culture) stimulated  
416 with K-BCG, BCG, K-Map, Map and zymosan. Data are composed of combined values  
417 obtained of all cows (n=4), with samples run in duplicates. (\* p<0.05; \*\* p<0.01;\*\*\*  
418 p<0.001)

419

420 **PMNs show similar killing levels of Map and BCG, whilst MDMs are more**  
421 **effective at killing BCG**

422 After demonstrating that ET release can be triggered by mycobacteria after 4 hours, we  
423 next assessed whether ET formation at an early time point may be beneficial in terms of  
424 bacterial clearance. For this purpose, the killing capacity of PMNs, MDMs and co-  
425 cultures against both mycobacteria after 24 h was quantified. Total inoculated CFU (0  
426 h) and CFU at 24h for all cultures are shown in Figures 5A and 5C. MDMs and CCs  
427 were more effective at killing BCG compared to PMNs alone, whereas PMNs were  
428 more effective at killing Map compared to MDMs. Distribution of live and killed BCG  
429 and Map in culture cells and supernatant is shown in Figure 5B and Figure 5D.

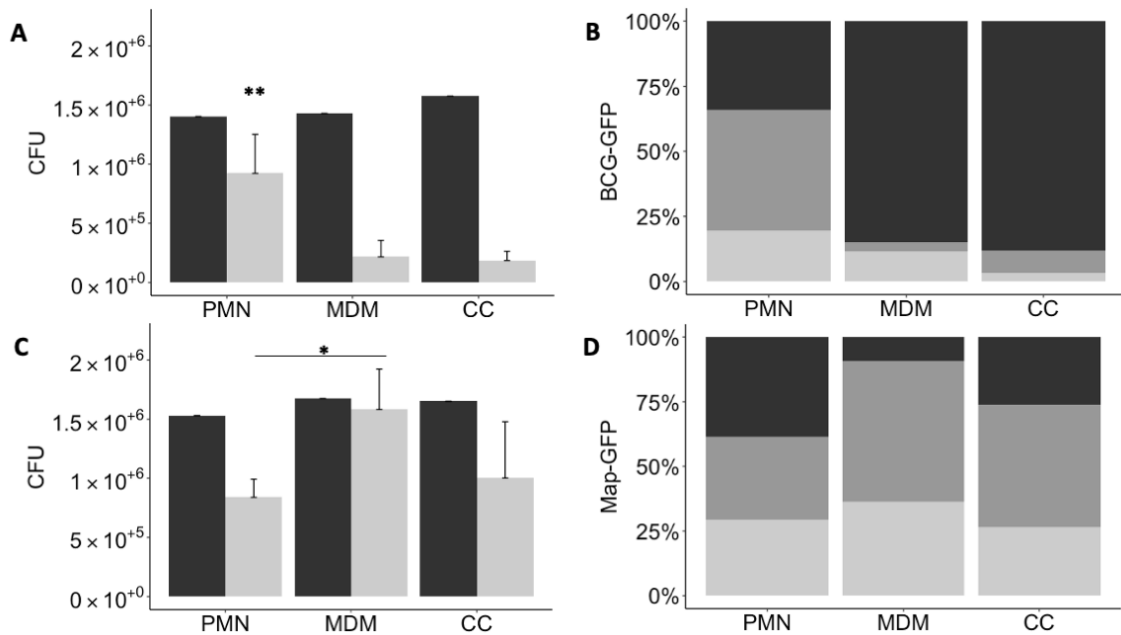

430

431 **Figure 5.** Mycobacterial killing assay results. Distribution of mycobacteria (A) total  
 432 CFUs of BCG-GFP (B) % BCG-GFP (C) total CFUs Map-GFP (D) % Map-GFP in 24h  
 433 cultures of PMNs, MDMs and in direct contact co-cultures (CC). In (A) and (C) in  
 434 black the 0h control and in grey 24h assay. In (B) and (D) in black the fraction of killed  
 435 bacteria, dark-grey alive bacteria non-internalized from the supernatant and light grey  
 436 the proportion of internalized bacteria that survived inside the adherent cells. Data  
 437 composed of combined values obtained of all cows (n=4), with samples run in duplicate  
 438 (\* p<0.05, \*\*, p<0.01).

439

440 Statistical analysis revealed significant differences between MDMs, PMNs and CCs  
 441 showing higher killing of BCG in MDM cultures compared to PMNs (84.85% vs  
 442 34.15%, p=0.0016), and higher Map killing in PMN cultures than in MDMs (38.36% vs  
 443 9.14%, p=0.045). PMN culture killing rate against BCG was lower than in co-cultures  
 444 (34.14% vs 88.19%; p=0.001), whereas MDM culture killing rate against Map was  
 445 lower compared to co-cultures (9.14% vs 26.10%; p=0.065), although it was not  
 446 statistically significant. Considering that CCs include half of the amount of each cell  
 447 type, and that each cell type shows a certain killing capacity in individual culture,  
 448 results indicate that co-cultures infected with BCG showed improved killing results  
 449 (expected killing: 59.49% vs observed killing: 88.19%). In contrast, this synergic effect  
 450 was not evident in co-cultures infected with Map, showing only 2.35% of improvement  
 451 (expected killing: 76.24% vs observed killing: 73.89%).

452 When bacterial survival inside adherent cells of each cell-culture type was compared  
 453 (Figure 6B and 6D), significant differences were not observed for either BCG or Map.  
 454 However, non-internalized BCG survival in PMN cultures (46.23%) was higher than in



455 MDM cultures (3.44%,  $p=0.021$ ) and in co-cultures (8.65%,  $p=0.021$ ), whereas non-  
456 internalized Map survival in PMN cultures was lower than in MDM cultures (54.46%  
457 vs 32.17%,  $p=0.03$ ). Map-GFP survival inside adherent cells was higher than BCG-GFP  
458 as expected.

459 **MDMs alone release higher levels of IL-1 $\beta$  and IL-8 compared to PMNs and alone**  
460 **or co-cultured with PMNs in response to both mycobacteria**

461 Having assessed the killing capacity of both cell types to different mycobacterial strains,  
462 we next investigated whether their cytokine response follows a similar pattern.  
463 Considering that IL-8 is a major ET inducer in PMNs (23) and IL-1 $\beta$  is a key mediator  
464 of the inflammatory response that attracts M $\Phi$  to the infection site (19), we also  
465 analysed the levels of these cytokines. IL-1 $\beta$  release after 24h showed significant  
466 differences between the culture types against both mycobacteria (Figure 6A). MDM  
467 cultures released higher concentrations of IL-1 $\beta$  in response to infection with BCG in  
468 comparison to PMN ( $p<0.001$ ) and CC ( $p=0.009$ ) as well as in response to infection  
469 with Map in comparison with PMN ( $p=0.035$ ).

470

471 IL-8 levels after 24 hours are shown in Figure 6B. Similar as seen for IL-1 $\beta$ , MDMs  
472 released more IL-8 into the supernatant compared to co-cultures (BCG;  $p<0.001$ , Map;  
473  $p=0.013$ ) or PMNs alone (BCG;  $p=0.001$ , Map;  $p=0.005$ ). As before, MDMs  
474 challenged with BCG produced significantly more IL-8 than challenge with Map  
475 ( $p=0.011$ ).

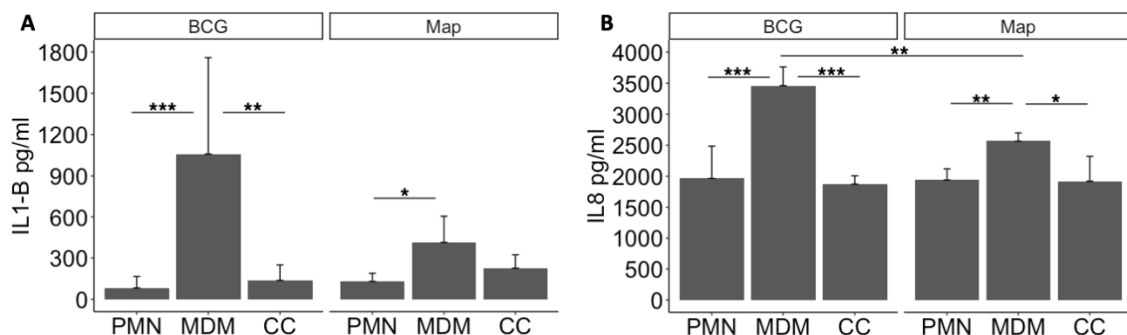

476

477 **Figure 6.** (A) IL-1 $\beta$  and (B) IL-8 release of PMN, MDM and CC stimulated with BCG  
478 and Map after 24h. Data composed of combined values obtained of all cows (n=4), with  
479 samples run in duplicate (\*  $p<0.05$ , \*\*;  $p<0.01$ ; \*\*\*  $p<0.001$ ).

480

481 **Correlation analysis of cytokine production and bacteria killing rates suggest**  
482 **different mechanism interplay between MDMs and PMNs against BCG and Map.**

483 Correlation analyses were performed between cytokine levels, and mycobacteria killing  
484 rates to evaluate the strength of relationship between both parameters (Table 1). The  
485 correlation study was performed including the data from all the culture types together  
486 and then subdivided by culture type and stimuli. IL-1 $\beta$  and IL-8 levels were positively  
487 correlated at 24h including all culture types in the analysis indicating that both  
488 cytokines are secreted in the same culture conditions in our assay. This correlation  
489 improved when eliminating the CCs from the analysis suggesting that cytokine release  
490 follows a different pattern in CCs. BCG-stimulated cultures showed a positive  
491 correlation between IL-1 $\beta$  and killing rate, which increased when eliminating CCs from  
492 the analysis. On the other hand, Map-stimulated cultures showed a negative correlation  
493 between IL-1 $\beta$  and killing rates, and in this case power was increased when analysing  
494 PMNs alone. IL-8 and killing capacity were positively correlated in MDM cultures. IL-  
495 8 and killing rates were negatively correlated in Map-stimulated cultures.

496 **Discussion**

497 Map is the etiological agent of PTB, a chronic enteritis that affects livestock production  
498 worldwide. Furthermore, Map provides a potential zoonotic risk and is discussed to be  
499 associated with the occurrence of Crohn's Disease in humans (35, 36). Research into the  
500 pathogenesis of PTB on the cellular level has mainly focused on the interaction of Map  
501 with M $\Phi$  since these have been considered to be the main immune cell subset invaded  
502 by this intracellular pathogen. Less attention has been given to the role PMN play in the  
503 pathogenesis of PTB, although these are present at sites showing pathological  
504 alterations during early stages of Map infection (5). In the present work, we have  
505 investigated some aspects of the interaction of bovine PMN and MDM *in vitro* with  
506 Map and BCG, a better studied mycobacterium. Furthermore, we assessed whether  
507 cooperation of both phagocytic cells is advantageous for the elimination of these  
508 mycobacteria, analysing ET release, pro-inflammatory cytokine levels and killing of  
509 mycobacteria. To the best of our knowledge, this is the first study describing ET release  
510 against Map.

511

512 Bovine PMNs and MDMs were cultured separately and together. PMNs showed higher  
513 ET release against killed mycobacteria in comparison to MDMs indicating that  
514 inactivated Map and BCG can trigger this mechanism in PMNs. Direct contact co-  
515 cultures showed less ET release compared to transwell system culture PMNs (TW-  
516 PMNs) and MDMs (TW-MDMs). Indeed, this was observed for all stimuli tested;  
517 zymosan and both mycobacteria, independent whether these were alive or inactivated.  
518 This generalized lower ET detection in direct co-cultures could be due to ET removal by  
519 efferocytosis, a process in which apoptotic cells (PMNs and/or MDMs) are removed by  
520 phagocytic cells (MDMs) or to a more powerful paracrine signalling activation of  
521 PMNs for ETosis by MDMs in the absence of cell-to-cell contact.

522

523 TW-PMNs were the cell culture type showing significantly higher ET release  
524 challenged with both, inactivated or live mycobacteria, whereas TW-MDMs liberated  
525 low levels of ETs, comparable to CC. In fact, ET release by TW-PMNs was higher in  
526 presence of live Map. These results suggest that mycobacteria trigger PMN ETosis, and  
527 that soluble factors secreted by MDMs, when cell-to-cell contact is not possible, further  
528 drive PMNs in this direction, particularly when Map is alive. However, in cell-to-cell  
529 contact interactions ET release would not be the principal mechanism exerted by PMNs.  
530 Actually, PMNs in co-culture (CC) present more internalized BCG bacilli and less  
531 detectable ETs. In contrast, in Map stimulated CCs, PMNs appear to have condensed  
532 nuclei indicative of apoptosis and no detectable histones, rarely detectable ETs and few  
533 internalized Map bacilli, whereas MDMs have histones in their cytoplasm.

534

535 Histones can be actively secreted into the extracellular space by activated inflammatory  
536 cells (37) and by ET release (38) or are derived more passively by apoptotic and  
537 necrotic cells (37). Inhibition of efferocytosis by extracellular histones has been  
538 reported in both *in vitro* and *in vivo* conditions (39). In our experimental conditions, we  
539 believe that in Map stimulated CCs, activated or apoptotic PMNs liberate histones alone  
540 or with ETs that are engulfed subsequently by MDMs, inhibiting efferocytosis and for  
541 this reason apoptotic PMNs are still present but ETs are not detectable.

542

543 With regards to the differences seen for bacterial killing, these were most pronounced  
544 against both mycobacteria in MDM alone. MDM were highly efficient in killing the  
545 attenuated BCG strain, but they seemed to be unable to kill Map in the tested

546 conditions. In contrast, PMNs showed a similar killing capacity against both  
547 mycobacteria species tested. Interestingly though, when both immune cell types were  
548 co-cultured in a 1:1 ratio, the killing capacity was unaltered with regards to BCG, but  
549 was similar to that obtained in PMNs for Map. Nevertheless, taking into account that  
550 CCs are composed by half of each cell type compared to MDM or PMN cultures, the  
551 obtained CC results indicate that a synergistic effect (observed killing > expected  
552 killing) in terms of improved killing capacity in BCG-infected co-cultures is observed,  
553 whereas in Map-infected co-cultures the effect was additive (observed killing =  
554 expected killing).

555

556 Independent of the condition, our results indicate that PMNs alone are effective at  
557 killing Map and that their presence at the infection site in initial stages can be  
558 potentially beneficial for the resolution of the disease. Indeed, Brown et al. (40) and  
559 Jones et al. (41) demonstrated that human PMN are capable of controlling the infection  
560 of Mtb *in vitro* and another study showed that murine PMN are able to kill  
561 *Mycobacterium avium ex vivo* when activated *in vivo* with G-CSF (42).

562

563 In general, MDMs presented higher release of the assayed cytokines compared to PMNs  
564 and CCs against both mycobacteria. Cytokine levels of co-cultures were lower than  
565 expected, resulting equivalent to those obtained in cultures of PMNs alone. A study by  
566 Sawant and McMurray showed an additive effect of IL-8 and IL-1 $\beta$  release in co-  
567 cultures of guinea pig PMN with alveolar M $\Phi$  challenged *in vitro* with Mtb (43). It is  
568 likely that those results were obtained because their co-cultures harboured PMN and  
569 M $\Phi$  in a 1:1 ratio, but doubling the total amount of cells, whereas our study halves the  
570 amount of each cell type to preserve the total cell amount. In addition, differences on  
571 host and mycobacteria species and MDM sources (lung isolated cells in their case and  
572 peripheral isolated cells in our case), make a comparison between both studies difficult.

573

574 Although traditionally considered a product predominantly secreted by monocytes and  
575 M $\Phi$ , PMN, are also capable of producing IL-1 $\beta$ , although at lower levels (44). Our  
576 results are consistent with this fact. MDMs alone produced higher IL-1 $\beta$  quantities than  
577 PMNs against both mycobacterial species. Anti-inflammatory mediators released from  
578 phagocytes act in an autocrine/paracrine manner, suppressing the expression of IL-1 $\beta$

579 and other inflammatory cytokines (45). This could be the explanation of the observed  
580 lower IL-1 $\beta$  levels in CCs. Indeed, the high IL-1 $\beta$  and IL-1 $\alpha$  levels described by others  
581 in PTB (46) could be reasonably explained by the already described PMN activation  
582 and recruitment impairment, (28, 29; 47- 49) and the low numbers of PMN associated  
583 to PTB granulomatous lesions (50, 51). Moreover, high levels of these cytokines are  
584 proposed as candidates responsible for PTB inflammation process and contributors to  
585 the development of the Th17 response during the final stages of the disease (52).

586

587 IL-8 expression has also been described to increase in PTB and monocytes stimulated  
588 with Map (53, 54) compared to controls. In our study IL-8 secretion of the same  
589 individuals against BCG and Map was compared. The lower IL-8 release of Map versus  
590 BCG stimulated MDMs could be a reflection of higher pathogenicity of Map in MDMs.  
591 In this line, a study of a *Mtb* multidrug resistant strain, revealed a novel survival  
592 strategy of the mentioned strain inside lung epithelial cells by decreasing cells' release  
593 of IL-8, limiting PMN recruitment to the site of infection (55).

594

595 A positive correlation between IL-1 $\beta$  and IL-8 release has been observed in the present  
596 experiment. An increase of both cytokines is positively correlated with the killing of  
597 BCG, being higher in MDMs. However, Map infection is negatively correlated with  
598 killing and the effect is stronger in PMNs. Low IL-8 levels have been associated to poor  
599 prognosis in hTB (23) and survival of *Mtb* inside M $\Phi$  by altering PMN effector  
600 functions (55). In the present experiments, IL-8 levels were high in PMN, MDM and  
601 co-cultures, indicating that despite the negative correlation with Map killing, more  
602 factors are involved in this interaction. As for IL-1 $\beta$ , previous studies have shown that  
603 IL-1 knock-out mice show an increased susceptibility to *Mtb* infection, developing a  
604 higher bacterial burden and mortality (56). With this in mind, we would have expected  
605 that the lowest mycobacterial survival rate would be seen in the cultures with the  
606 highest levels of IL-1 $\beta$ . Whereas we saw this in the case of BCG, it was not the case of  
607 Map-stimulated MDM cultures, indicating once again that more factors are involved. In  
608 fact, *in vitro* studies indicate that Map infection promotes a self-destruction state in the  
609 epithelium caused by increased IL-1 $\beta$  levels that attract M $\Phi$ , thus providing Map with  
610 an escape route from destruction (57).

611

612 Based on the results obtained in our experiments, we hypothesize that bovine PMN may  
613 have an important role against Map. PMN trigger inflammatory responses through IL-  
614  $1\beta$  release and start an effective response phagocytosing and immobilizing bacteria with  
615 their NETs. As a consequence,  $M\Phi$  are activated and attracted by IL- $1\beta$  production to  
616 the site of infection. Upon arrival,  $M\Phi$  would phagocytose neutrophils' ETs and  
617 apoptotic rests, which provides them with the antimicrobial compounds produced by  
618 neutrophils' after first contact with Map, thus downregulating the inflammatory  
619 response leaded by IL- $1\beta$ , IL-23 and IL-17 expression, ending ultimately in Map  
620 destruction. The timing is probably important in this cooperation and if  $M\Phi$ s arrive at  
621 the infection site too early, PMN might not have enough time to effectively expand their  
622 antimicrobial mechanisms,  $M\Phi$  will be the dominant cell type attempting Map  
623 elimination but end-up being taken over by Map as a Trojan horse. PMN have been  
624 postulated as innate effectors of TB resistance due to their highly effective antimicrobial  
625 effector mechanisms they can expand during the early stage of Mtb infection (58).  
626 Applied to Map, it could be that harbouring a particular number of competent and  
627 tightly regulated PMN capable of expanding the correct antimicrobial mechanism at the  
628 specific time may be the difference between being resistant to PTB or developing  
629 subclinical or clinical disease.

## 630 **Conclusions**

631 Taking all assayed parameters into consideration, we could conclude that cooperation of  
632 MDMs and PMNs may confer advantages through different mechanisms depending on  
633 the pathogen. As for BCG, co-cultures show good levels of elimination of the  
634 mycobacteria (high killing rates) and lower cytokine levels and ET release than the  
635 PMN and MDM cultures, which, could translate to a decreased tissue damage in the  
636 living organism, since an excessive inflammatory reaction would not take place. In Map  
637 stimulated cultures, co-cultures show slightly worse figures for mycobacteria killing  
638 compared to PMNs but improved rates compared to MDMs, also with lower levels of  
639 pro-inflammatory cytokines. In BCG, ET release is negatively correlated to bacterial  
640 killing, suggesting that killing could be due to phagocytosis, whereas as in Map ET  
641 release is positively correlated to bacterial killing, suggesting that probably most killing  
642 is due to PMNs ETosis and provision of macrophages with killing capacity molecules in  
643 the co-cultures. Further research should involve *in vivo* studies to confirm that PMNs

644 are necessary in the defence against Map and studies clarifying which soluble factors  
645 secreted by MDMs drive PMNs towards ET, and which subsets of PMNs are involved  
646 in each effector mechanism in order to develop therapeutic agents targeted at improving  
647 PMN competence.

#### 648 **Conflict of Interest**

649 The authors declare that the research was conducted in the absence of any commercial  
650 or financial relationships that could be construed as a potential conflict of interest.

#### 651 **Author Contributions**

652 DW and NE conceived the study. AU carried out the animal sampling. IL, EM, AH, JK,  
653 HH and NE performed the laboratory work. IL and NE compiled and analyzed the data.  
654 IL and NE collated the results. IL, NE, JA and DW drafted the preliminary manuscript.  
655 All authors participated in the review and the editing of the final draft and also read and  
656 approved its final version.

#### 657 **Acknowledgments**

658 The authors want to thank Ainara Badiola and Maddi Oyanguren for technical support  
659 and Joseba Garrido for critical reading of the manuscript. Funding was provided by  
660 Spanish central government and Basque research project PROBAK (RTA 2017-00089-  
661 00-00) and by the Departamento de Economía e Infraestructuras of the Basque  
662 Government. IL held a pre-doctoral grant from Departamento de Economía e  
663 Infraestructuras of the Basque Government (2017) and was granted an EMBO short-  
664 term fellowship (8407) and a FEMS research and training grant (FEMS-GO-2019-507).  
665 The funders had no role in the study design, data collection and interpretation, or the  
666 decision to submit the work for publication.

#### 667 **References**

- 668 1. Hasonova L, Hasonova L, Pavlik I. Economic impact of paratuberculosis in dairy  
669 cattle herds: a review. *Vet Med* (2006) **51**:193–211. doi:10.17221/5539-  
670 VETMED
- 671 2. Bastida F, Juste RA. Paratuberculosis control: A review with a focus on  
672 vaccination. *J Immune Based Ther Vaccines* (2011) **9**: doi:10.1186/1476-8518-9-

- 673 8
- 674 3. Juste RA, Alonso-Hearn M, Molina E, Geijo M, Vazquez P, Sevilla IA, Garrido  
675 JM. Significant reduction in bacterial shedding and improvement in milk  
676 production in dairy farms after the use of a new inactivated paratuberculosis  
677 vaccine in a field trial. *BMC Res Notes* (2009) **2**:233. doi:10.1186/1756-0500-2-  
678 233
- 679 4. Reddacliff L, Eppleston J, Windsor P, Whittington R, Jones S. Efficacy of a  
680 killed vaccine for the control of paratuberculosis in Australian sheep flocks. *Vet*  
681 *Microbiol* (2006) **115**:77–90. doi:10.1016/j.vetmic.2005.12.021
- 682 5. Khare S, Nunes JS, Figueiredo JF, Lawhon SD, Rossetti CA, Gull T, Rice-Ficht  
683 AC, Adams LG. Early phase morphological lesions and transcriptional responses  
684 of bovine ileum infected with *Mycobacterium avium* subsp. *paratuberculosis*. *Vet*  
685 *Pathol* (2009) **46**:717–728. doi:10.1354/vp.08-VP-0187-G-FL
- 686 6. Jimbo S, Suleman M, Maina T, Prysliak T, Mulongo M, Perez-Casal J. Effect of  
687 *Mycoplasma bovis* on bovine neutrophils. *Vet Immunol Immunopathol* (2017)  
688 **188**:27–33. doi:10.1016/j.vetimm.2017.04.011
- 689 7. Cassatella MA, Locati M, Mantovani A. Never underestimate the power of a  
690 neutrophil. *Immunity* (2009) **31**:698–700. doi:10.1016/j.immuni.2009.10.003
- 691 8. Brinkmann V, Reichard U, Goosmann C, Fauler B, Uhlemann Y, Weiss DS,  
692 Weinrauch Y, Zychlinsky A. Neutrophil Extracellular Traps Kill Bacteria.  
693 *Science* (2004) **303**:1532–1535. doi:10.1126/science.1092385
- 694 9. Aulik NA, Hellenbrand KM, Czuprynski CJ. *Mannheimia haemolytica* and its  
695 leukotoxin cause macrophage extracellular trap formation by bovine  
696 macrophages. *Infect Immun* (2012) **80**:1923–1933. doi:10.1128/IAI.06120-11
- 697 10. Fuchs TA, Abed U, Goosmann C, Hurwitz R, Schulze I, Wahn V, Weinrauch Y,  
698 Brinkmann V, Zychlinsky A. Novel cell death program leads to neutrophil  
699 extracellular traps. *J Cell Biol* (2007) **176**:231–241. doi:10.1083/jcb.200606027
- 700 11. Skendros P, Mitroulis I, Ritis K. Autophagy in neutrophils: From granulopoiesis  
701 to neutrophil extracellular traps. *Front Cell Dev Biol* (2018) **6**:  
702 doi:10.3389/fcell.2018.00109
- 703 12. Shrestha S, Lee JM, Hong CW. Autophagy in neutrophils. *Korean J Physiol*  
704 *Pharmacol* (2020) **24**:1–10. doi:10.4196/kjpp.2020.24.1.1
- 705 13. Benati D, Ferro M, Savino MT, Ulivieri C, Schiavo E, Nuccitelli A, Pasini FL,  
706 Baldari CT. Opposite effects of simvastatin on the bactericidal and inflammatory



- 707 response of macrophages to opsonized *S. aureus*. *J Leukoc Biol* (2010) **87**:433–  
708 442. doi:10.1189/jlb.0409273
- 709 14. Wong KW, Jacobs WR. *Mycobacterium tuberculosis* exploits human interferon  $\gamma$   
710 to stimulate macrophage extracellular trap formation and necrosis. *J Infect Dis*  
711 (2013) **208**:109–119. doi:10.1093/infdis/jit097
- 712 15. Muñoz-Caro T, Silva LMR, Ritter C, Taubert A, Hermosilla C. *Besnoitia*  
713 *besnoiti* tachyzoites induce monocyte extracellular trap formation. *Parasitol Res*  
714 (2014) **113**:4189–4197. doi:10.1007/s00436-014-4094-3
- 715 16. Boe DM, Curtis BJ, Chen MM, Ippolito JA, Kovacs EJ. Extracellular traps and  
716 macrophages: new roles for the versatile phagocyte. *J Leukoc Biol* (2015)  
717 **97**:1023–1035. doi:10.1189/jlb.4ri1014-521r
- 718 17. Silva MT. When two is better than one: macrophages and neutrophils work in  
719 concert in innate immunity as complementary and cooperative partners of a  
720 myeloid phagocyte system. *J Leukoc Biol* (2010) **87**:93–106.  
721 doi:10.1189/jlb.0809549
- 722 18. Silva MT, Silva MN, Appelberg R. Neutrophil-macrophage cooperation in the  
723 host defence against mycobacterial infections. *Microb Pathog* (1989) **6**:369–380.  
724 doi:10.1016/0882-4010(89)90079-X
- 725 19. Tan BH, Meinken C, Bastian M, Bruns H, Legaspi A, Ochoa MT, Krutzik SR,  
726 Bloom BR, Ganz T, Modlin RL, et al. Macrophages acquire neutrophil granules  
727 for antimicrobial activity against intracellular pathogens. *J Immunol* (2008)  
728 **180**:664.2-664. doi:10.4049/jimmunol.180.1.664-a
- 729 20. Lopez-Castejon G, Brough D. Understanding the mechanism of IL-1 $\beta$  secretion.  
730 *Cytokine Growth Factor Rev* (2011) **22**:189–195.  
731 doi:10.1016/j.cytogfr.2011.10.001
- 732 21. Kenefick KB, Adams JL, Steinberg H, Czuprynski CJ. In vivo administration of  
733 a monoclonal antibody against the type I IL-1 receptor inhibits the ability of mice  
734 to eliminate *Mycobacterium paratuberculosis*. *J Leukoc Biol* (1994) **55**:719–722.  
735 doi:10.1002/jlb.55.6.719
- 736 22. Dinarello CA. Anti-inflammatory Agents: Present and Future. *Cell* (2010)  
737 **140**:935–950. doi:10.1016/j.cell.2010.02.043
- 738 23. Krupa A, Fol M, Dziadek BR, Kepka E, Wojciechowska D, Brzostek A,  
739 Torzewska A, Dziadek J, Baughman RP, Griffith D, et al. Binding of CXCL8/IL-  
740 8 to *Mycobacterium tuberculosis* modulates the Innate Immune Response.

- 741 *Mediators Inflamm* (2015)**2015**:124762. doi:10.1155/2015/124762
- 742 24. Gupta AK, Hasler P, Holzgreve W, Gebhardt S, Hahn S. Induction of neutrophil  
743 extracellular DNA lattices by placental microparticles and IL-8 and their  
744 presence in preeclampsia. *Hum Immunol* (2005) **66**:1146–1154.  
745 doi:10.1016/j.humimm.2005.11.003
- 746 25. Dotta U, Guglielmino R, Cagnasso A, D'Angelo A, Prato S, Bosso M. Effects of  
747 subclinical bovine paratuberculosis on in-vitro polymorphonuclear neutrophil  
748 migration. *J Comp Pathol* (1999) **121**:399–403. doi:10.1053/jcpa.1999.0033
- 749 26. Coussens PM. Model for immune responses to *Mycobacterium avium* subspecies  
750 *paratuberculosis* in cattle. *Infect Immun* (2004) **72**:3089–3096.  
751 doi:10.1128/IAI.72.6.3089-3096.2004
- 752 27. Park H-E, Park H-T, Jung YH, Yoo HS. Gene expression profiles of immune-  
753 regulatory genes in whole blood of cattle with a subclinical infection of  
754 *Mycobacterium avium* subsp. *paratuberculosis*. *PLoS One* (2018) **13**:e0196502.  
755 doi:10.1371/journal.pone.0196502
- 756 28. Alonso-Hearn M, Canive M, Blanco-Vazquez C, Torremocha R, Balseiro A,  
757 Amado J, Varela-Martinez E, Ramos R, Jugo BM, Casais R. RNA-Seq analysis  
758 of ileocecal valve and peripheral blood from Holstein cattle infected with  
759 *Mycobacterium avium* subsp. *paratuberculosis* revealed dysregulation of the  
760 CXCL8/IL8 signaling pathway. *Sci Rep* (2019) **9**:14845. doi:10.1038/s41598-  
761 019-51328-0
- 762 29. David J, Barkema HW, Guan LL, De Buck J. Gene-expression profiling of calves  
763 6 and 9 months after inoculation with *Mycobacterium avium* subspecies  
764 *paratuberculosis*. *Vet Res* (2014) **45**:96. doi:10.1186/s13567-014-0096-5
- 765 30. Martineau AR, Newton SM, Wilkinson KA, Kampmann B, Hall BM, Nawroly  
766 N, Packe GE, Davidson RN, Griffiths CJ, Wilkinson RJ. Neutrophil-mediated  
767 innate immune resistance to mycobacteria. *J Clin Invest* (2007) **117**:1988–1994.  
768 doi:10.1172/JCI31097
- 769 31. Cirone KM, Lahiri P, Holani R, Tan YL, Arrazuria R, De Buck J, Barkema HW,  
770 Cobo ER. Synthetic cathelicidin LL-37 reduces *Mycobacterium avium* subsp.  
771 *paratuberculosis* internalization and pro-inflammatory cytokines in macrophages.  
772 *Cell Tissue Res* (2020) **379**:207–217. doi:10.1007/s00441-019-03098-4
- 773 32. Parker AE, Bermudez LE. Expression of the green fluorescent protein (GFP) in  
774 *Mycobacterium avium* as a tool to study the interaction between Mycobacteria

- 775 and host cells. *Microb Pathog* (1997) **22**:193–198. doi:10.1006/mpat.1996.0106
- 776 33. Von Köckritz-Blickwede M, Chow O, Ghochani M, Nizet V. Visualization and  
777 functional evaluation of phagocyte extracellular traps. *Methods in Microbiology*  
778 (2010) **37**:139-160. doi:10.1016/S0580-9517(10)37007-3
- 779 34. Conejeros I, Velásquez ZD, Grob D, Zhou E, Salecker H, Hermosilla C, Taubert  
780 A. Histone h2a and bovine neutrophil extracellular traps induce damage of  
781 *Besnoitia besnoiti*-infected host endothelial cells but fail to affect total parasite  
782 proliferation. *Biology (Basel)* (2019) **8**:78. doi:10.3390/biology8040078
- 783 35. Behr MA, Kapur V. The evidence for *Mycobacterium paratuberculosis* in  
784 Crohn's disease. *Curr Opin Gastroenterol* (2008) **24**:17–21.  
785 doi:10.1097/MOG.0b013e3282f1dcc4
- 786 36. Juste RA, Elguezabal N, Garrido JM, Pavon A, Geijo M V., Sevilla I, Cabriada J-  
787 L, Tejada A, García-Campos F, Casado R, et al. On the Prevalence of *M. avium*  
788 Subspecies *paratuberculosis* DNA in the Blood of Healthy Individuals and  
789 Patients with Inflammatory Bowel Disease. *PLoS One* (2008) **3**:e2537.  
790 doi:10.1371/journal.pone.0002537
- 791 37. Xu J, Zhang X, Monestier M, Esmon NL, Esmon CT. Extracellular Histones Are  
792 Mediators of Death through TLR2 and TLR4 in Mouse Fatal Liver Injury. *J*  
793 *Immunol* (2011) **187**:2626–2631. doi:10.4049/jimmunol.1003930
- 794 38. Papayannopoulos V, Zychlinsky A. NETs: a new strategy for using old weapons.  
795 *Trends Immunol* (2009) **30**:513–521. doi:10.1016/j.it.2009.07.011
- 796 39. Friggeri A, Banerjee S, Xie N, Cui H, de Freitas A, Zerfaoui M, Dupont H,  
797 Abraham E, Liu G. Extracellular histones inhibit efferocytosis. *Mol Med* (2012)  
798 **18**:825–833. doi:10.2119/molmed.2012.00005
- 799 40. Arthur E. Brown, Timothy J. Holzer, Burton R. Andersen. Capacity of Human  
800 Neutrophils to Kill *Mycobacterium tuberculosis*. *The Journal of Infectious*  
801 *Diseases* (1987) **156**: 985-989. doi: 10.1093/infdis/156.6.985
- 802 41. Jones GS, Amirault HJ, Andersen BR. Killing of *Mycobacterium tuberculosis* by  
803 neutrophils: A nonoxidative process. *J Infect Dis* (1990) **162**:700–704.  
804 doi:10.1093/infdis/162.3.700
- 805 42. Bermudez LE, Petrofsky M, Stevens P. Treatment with recombinant granulocyte  
806 colony-stimulating factor (Filgrastin(TM)) stimulates neutrophils and tissue  
807 macrophages and induces an effective non-specific response against  
808 *Mycobacterium avium* in mice. *Immunology* (1998) **94**:297–303.

- 809 doi:10.1046/j.1365-2567.1998.00529.x
- 810 43. Sawant K V., McMurray DN. Guinea pig neutrophils infected with  
811 *Mycobacterium tuberculosis* produce cytokines which activate alveolar  
812 macrophages in noncontact cultures. *Infect Immun* (2007) **75**:1870–1877.  
813 doi:10.1128/IAI.00858-06
- 814 44. Malyak M, Smith MF, Abel AA, Arend WP. Peripheral blood neutrophil  
815 production of interleukin-1 receptor antagonist and interleukin-1 $\beta$ . *J Clin*  
816 *Immunol* (1994) **14**:20–30. doi:10.1007/BF01541172
- 817 45. Vandivier RW, Henson PM, Douglas IS. Burying the dead: the impact of failed  
818 apoptotic cell removal (efferocytosis) on chronic inflammatory lung disease.  
819 *Chest* (2006)**129**:1673-82. doi: 10.1378/chest.129.6.1673
- 820 46. Chiang SK, Sommer S, Aho AD, Kiupel M, Colvin C, Tooker B, Coussens PM.  
821 Relationship between *Mycobacterium avium* subspecies *paratuberculosis*, IL-1 $\alpha$ ,  
822 and TRAF1 in primary bovine monocyte-derived macrophages. *Vet Immunol*  
823 *Immunopathol* (2007) **116**:131–144. doi:10.1016/j.vetimm.2007.01.005
- 824 47. Marfell BJ, O'Brien R, Griffin JFT. Global gene expression profiling of  
825 monocyte-derived macrophages from red deer (*Cervus elaphus*) genotypically  
826 resistant or susceptible to *Mycobacterium avium* subspecies *paratuberculosis*  
827 infection. *Dev Comp Immunol* (2013) **40**:210–217. doi:10.1016/j.dci.2013.02.004
- 828 48. Gossner A, Watkins C, Chianini F, Hopkins J. Pathways and Genes Associated  
829 with Immune Dysfunction in Sheep Paratuberculosis. *Sci Rep* (2017) **7**:46695.  
830 doi:10.1038/srep46695
- 831 49. Ibeagha-Awemu E, Do D, Dudemaine P, Bissonnette N. PSXIV-17 Gene co-  
832 expression network analysis identifies important modules and genes for cow's  
833 response to *Mycobacterium avium* ssp. *paratuberculosis* infection in the small  
834 intestine. *J Anim Sci* (2018) **96**:39. doi:10.1093/jas/sky404.088
- 835 50. Krüger C, Köhler H, Liebler-Tenorio EM. Cellular composition of  
836 granulomatous lesions in gut-associated lymphoid tissues of goats during the first  
837 year after experimental infection with *Mycobacterium avium* subsp.  
838 *paratuberculosis*. *Vet Immunol Immunopathol* (2015) **163**:33–45.  
839 doi:10.1016/j.vetimm.2014.11.002
- 840 51. Lee H, Stabel JR, Kehrli ME. Cytokine gene expression in ileal tissues of cattle  
841 infected with *Mycobacterium paratuberculosis*. *Vet Immunol Immunopathol*  
842 (2001) **82**:73–85. doi:10.1016/S0165-2427(01)00340-3

- 843 52. DeKuiper JL, Coussens PM. Inflammatory th17 responses to infection with  
844 *Mycobacterium avium* subspecies *paratuberculosis* (MAP) in cattle and their  
845 potential role in the development of johne's disease. *Veterinary Immunology and*  
846 *Immunopathology* (2019) **218**:109954. doi:10.25335/7F47-KM75
- 847 53. Weiss DJ, Evanson OA, Moritz A, Deng MQ, Abrahamsen MS. Differential  
848 responses of bovine macrophages to *Mycobacterium avium* subsp.  
849 *paratuberculosis* and *Mycobacterium avium* subsp. *avium*. *Infect Immun* (2002)  
850 **70**:5556–5561. doi:10.1128/IAI.70.10.5556-5561.2002
- 851 54. Coussens PM, Verman N, Coussens MA, Elftman MD, McNulty AM. Cytokine  
852 Gene Expression in Peripheral Blood Mononuclear Cells and Tissues of Cattle  
853 Infected with *Mycobacterium avium* subsp. *paratuberculosis*: Evidence for An  
854 Inherent Proinflammatory Gene Expression Pattern. *Infect Immun* (2004)  
855 **72**:1409–1422. doi:10.1128/IAI.72.3.1409-1422.2004
- 856 55. Kviatcovsky D, Rivadeneyra L, Balboa L, Yokobori N, López B, Ritacco V,  
857 Schattner M, Sasiain MDC, De La Barrera S. *Mycobacterium tuberculosis*  
858 Multidrug-Resistant Strain M Induces Low IL-8 and Inhibits TNF-  $\alpha$  Secretion  
859 by Bronchial Epithelial Cells Altering Neutrophil Effector Functions. *Mediators*  
860 *Inflamm* (2017) **2017**:2810606. doi:10.1155/2017/2810606
- 861 56. Mayer-Barber KD, Barber DL, Shenderov K, White SD, Wilson MS, Cheever A,  
862 Kugler D, Hieny S, Caspar P, Núñez G, et al. Cutting Edge: Caspase-1  
863 Independent IL-1 $\beta$  Production Is Critical for Host Resistance to *Mycobacterium*  
864 *tuberculosis* and Does Not Require TLR Signaling In Vivo . *J Immunol* (2010)  
865 **184**:3326–3330. doi:10.4049/jimmunol.0904189
- 866 57. Lamont EA, O'Grady SM, Davis WC, Eckstein T, Sreevatsan S. Infection with  
867 *Mycobacterium avium* subsp. *paratuberculosis* results in rapid interleukin-1 $\beta$   
868 release and Macrophage transepithelial migration. *Infect Immun* (2012) **80**:3225–  
869 3235. doi:10.1128/IAI.06322-11
- 870 58. Kroon EE, Coussens AK, Kinnear C, Orlova M, Möller M, Seeger A, Wilkinson  
871 RJ, Hoal EG, Schurr E. Neutrophils: Innate effectors of TB resistance? *Front*  
872 *Immunol* (2018) **9**:2637. doi:10.3389/fimmu.2018.02637

### 873 **Data Availability Statement**

874 The datasets generated for this study are available on request. The raw data supporting  
875 the conclusions of this article will be made available by the authors, without undue  
876 reservation.

877 **Tables**

878 **Table 1.** Correlation analyses results between cytokine levels and mycobacteria killing  
879 rates.

880

| 881 | <b>Culture</b> |     |    | <b>Stimuli</b> |     | <b>Parameters</b> |      |         | <b>Correlation</b> |             |         |
|-----|----------------|-----|----|----------------|-----|-------------------|------|---------|--------------------|-------------|---------|
| 882 | PMN            | MDM | CC | BCG            | Map | IL-1 $\beta$      | IL-8 | killing | n                  | coefficient | p       |
| 883 | ✓              | ✓   | ✓  | ✓              | ✓   | ✓                 | ✓    | ✓       | 24                 | 0.64        | <0.0001 |
| 884 | ✓              | ✓   |    | ✓              | ✓   | ✓                 | ✓    |         | 16                 | 0.75        | 0.0011  |
| 885 | ✓              | ✓   | ✓  | ✓              |     | ✓                 |      | ✓       | 12                 | 0.75        | 0.0074  |
| 886 | ✓              | ✓   | ✓  |                | ✓   | ✓                 |      | ✓       | 8                  | 0.95        | 0.0011  |
| 887 | ✓              | ✓   |    |                | ✓   | ✓                 |      | ✓       | 12                 | -0.7        | 0.011   |
| 888 | ✓              |     |    |                | ✓   | ✓                 |      | ✓       | 4                  | -0.98       | 0.016   |
| 889 |                | ✓   |    | ✓              | ✓   |                   | ✓    | ✓       | 8                  | 0.87        | 0.0044  |
| 890 | ✓              | ✓   | ✓  | ✓              | ✓   |                   | ✓    | ✓       | 12                 | -0.8        | 0.002   |
